# Supplementary material for: Reaction of methionine with chlorine: kinetics, product formation, and potential use as a scavenger in chlorine dioxide-based systems
Source: Royal Society of Chemistry journal article supplement (doi:10.1039/d3ew00216k), 2023-11-04
Supplement: d3ew00216k1.pdf [file d3ew00216k1.pdf]

1        **Reaction of methionine with chlorine: kinetics, product formation, and**  
2        **potential use as scavenger in chlorine dioxide-based systems**  
3        **Electronic supporting information**

4  
5        Mischa Jütte<sup>1</sup>, Josephine Heyns<sup>1</sup>, Mohammad Sajjad Abdighahroudi<sup>1</sup>, Christoph Schüth<sup>2,3</sup>, and  
6        Holger V. Lutze\*<sup>1,3,4</sup>

7  
8        <sup>1</sup>Technical University of Darmstadt, Institute IWAR, Chair of environmental analytics and pollutants,  
9        Franziska-Braun-Straße 7, 64287 Darmstadt, Germany

10    <sup>2</sup>Technical University of Darmstadt, Institute of Applied Geosciences, Schnittspahnstr. 9, 64287 Darmstadt,  
11    Germany

12    <sup>3</sup>IWW Water Centre, Moritzstraße 26, D-45476 Mülheim an der Ruhr, Germany

13    <sup>4</sup>Centre for Water and Environmental Research (ZWU), Universitätsstraße 5, D-45141 Essen,  
14    Germany

15  
16    \*Corresponding author: [h.lutze@iwar.tu-darmstadt.de](mailto:h.lutze@iwar.tu-darmstadt.de)

17 Table S1: Chemicals used in this study.

| Name                   | Purity [%]   | Purpose of use                   | Manufacturer                                       |
|------------------------|--------------|----------------------------------|----------------------------------------------------|
| 1,4-Dimethylpiperazine | 98           | Compound under study             | Alfa Aesar (Haverhill, Massachusetts, USA)         |
| Acetonitrile           | $\geq 99.95$ | Eluent (LC)                      | Carl Roth (Karlsruhe, Germany)                     |
| Formic acid            | $\geq 99$    | Eluent (LC)                      | Sigma-Aldrich (St. Louis, Missouri, USA)           |
| Ammonium acetate       | $\geq 98$    | Eluent                           | Merck (Darmstadt, Germany)                         |
| Disodium phosphate     |              | pH Buffer                        | Merck (Darmstadt, Germany)                         |
| Glutathione            | $\geq 98$    | Compound under study             | Sigma-Aldrich (St. Louis, Missouri, USA)           |
| Glycine                | $> 99$       | HOCl Scavenger                   | Alfa Aesar (Haverhill, Massachusetts, USA)         |
| Hydroquinone           | $\geq 99$    | Compound under study             | Sigma-Aldrich (St. Louis, Missouri, USA)           |
| L-Methionine           | $\geq 98$    | Scavenger / Compound under study | Sigma-Aldrich (St. Louis, Missouri, USA)           |
| L-Methioninesulfoxide  |              | Compound under study             | Alfa Aesar (Haverhill, Massachusetts, USA)         |
| Sodium carbonate       |              | Eluent (IC)                      | Sigma-Aldrich (St. Louis, Missouri, USA)           |
| Sodium chlorate        | $> 99$       | Calibration standard             | Arcos organics (Fair Lawn, New Jersey, USA)        |
| Sodium chlorite        | 80           | Calibration standard / oxidant   | Honeywell   Fluka (Charlotte, North Carolina, USA) |
| Sodium chloride        | $>99.5$      | Calibration standard             | Honeywell (Charlotte, North Carolina, USA)         |
| Monosodium phosphate   | 98           | pH Buffer                        | Arcos Organics (Fair Lawn, New Jersey, USA)        |
| Sodium hypochlorite    | 11 – 15% FAC | Oxidant                          | Alfa Aesar (Haverhill, Massachusetts, USA)         |
| Sodium persulfate      | $> 99$       | ClO <sub>2</sub> production      | Carl Roth (Karlsruhe, Germany)                     |
| Phenol                 | $> 99$       | Compound under study             | Sigma-Aldrich (St. Louis, Missouri, USA)           |

19 Table S2: Instruments used in this study.

| Name                  | Component                         | Description                                           | Manufacturer                                        |
|-----------------------|-----------------------------------|-------------------------------------------------------|-----------------------------------------------------|
| Ion-Chromatography    | Autosampler                       | Dionex AS-AP                                          | Thermo Scientific (Waltham, Massachusetts, USA)     |
|                       | Column                            | Asupp7 – 250mm/4.0 $\mu\text{m}$                      | Metrohm (Herisau, Swiss)                            |
|                       | Column department                 | Dionex ICS-6000 DC                                    | Thermo Scientific (Waltham, Massachusetts, USA)     |
|                       | Conductivity detector             |                                                       | Thermo Scientific (Waltham, Massachusetts, USA)     |
|                       | Pump1 (Eluent)                    | Dionex ICS-6000 SP                                    | Thermo Scientific (Waltham, Massachusetts, USA)     |
|                       | Pump2 (Suppressor)                | Dionex AXP                                            | Thermo Scientific (Waltham, Massachusetts, USA)     |
|                       | Software                          | Chromeleon Console                                    | Thermo Scientific (Waltham, Massachusetts, USA)     |
|                       | Suppressor                        | Dionex ACRS 500                                       | Thermo Scientific (Waltham, Massachusetts, USA)     |
| Liquid Chromatography | Autosampler                       | 1260 Multisampler                                     | Agilent Technologies (Santa Clara, California, USA) |
|                       | Column                            | HILIC “Luna” $\text{NH}_2$ 3 $\mu\text{M}$ , 150/2 mm | Phenomenex (Torrance, California, USA)              |
|                       | Column department                 | 1260 MCT                                              | Agilent Technologies (Santa Clara, California, USA) |
|                       | Pump1 (Eluent)                    | 1260 flexible pump                                    | Agilent Technologies (Santa Clara, California, USA) |
|                       | Software                          | Agilent MassHunter                                    | Agilent Technologies (Santa Clara, California, USA) |
|                       | UV detector                       | 1260 DAD WR                                           | Agilent Technologies (Santa Clara, California, USA) |
|                       | Mass detector                     | 6470 Triple Quad LC-MS/MS                             | Agilent Technologies (Santa Clara, California, USA) |
| Photometer            | Photometer                        | Specord 200 Plus                                      | AnalytikJena (Jena, Germany)                        |
| pH-meter              | pH-meter                          | Terminal 740                                          | WTW Series inoLab (Weilheim, Germany)               |
| Balance               | Balance                           | SM2285Di-ION-C                                        | VWR (Radnor, Pennsylvania, USA)                     |
| Reaction tubes        | 15 mL CellStar <sup>®</sup> tubes | Polypropylene                                         | Greiner bio-one (Frickenhausen, Germany)            |
| HPLC Vials            | 1.5 mL Short thread vial          | Amber glass                                           | VWR (Radnor, Pennsylvania, USA)                     |
| HPLC Vials            | 1.5 mL Short thread vial          | Polypropylene                                         | VWR (Radnor, Pennsylvania, USA)                     |

20

21

22 Table S3: Ion chromatographic method used in this study.

|                                                  |                                      |
|--------------------------------------------------|--------------------------------------|
| Flow rate                                        | 0.75 mL × Min <sup>-1</sup>          |
| Measuring time                                   | 35 Min                               |
| Eluent A (4 mM Na <sub>2</sub> CO <sub>3</sub> ) | 90 %                                 |
| Eluent B (H <sub>2</sub> O)                      | 10 %                                 |
| Suppressor solution                              | 20 mM H <sub>2</sub> SO <sub>4</sub> |
| Suppressor flow rate                             | 1 mL × Min <sup>-1</sup>             |
| Injection volume                                 | 25 μL                                |
| Temperature autosampler                          | 5 °C                                 |
| Temperature column oven                          | 45 °C                                |
| Retention times                                  |                                      |
| Cl <sup>-</sup>                                  | 9.0 Min                              |
| ClO <sub>2</sub> <sup>-</sup>                    | 7.7 Min                              |
| ClO <sub>3</sub> <sup>-</sup>                    | 15.1 Min                             |

23

24 Table S4: LC-MS/MS method developed for the detection of MSO

|                                        |                            |
|----------------------------------------|----------------------------|
| Flow rate                              | 0.3 mL × Min <sup>-1</sup> |
| Measuring time                         | 20 Min                     |
| Eluent A (ACN)                         | 80 %                       |
| Eluent B (H <sub>2</sub> O + 0.1 % FA) | 20 %                       |
| Injection volume                       | 1 μL                       |
| Temperature column oven                | 25 °C                      |
| Precursor ion                          | 166 Da                     |
| Product ion                            | 74.1 Da                    |
| Acceleration energy                    | 5 V                        |
| Collision energy                       | 5 V                        |
| Polarity                               | Positive                   |
| Retention time MSO                     | 10.8 Min                   |

25

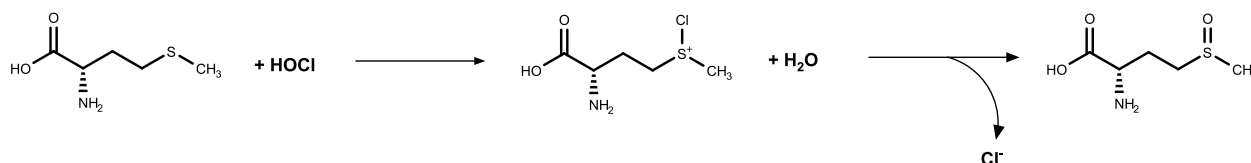

26

27 Figure S1: Proposed reaction pathway of methionine with HOCl. Adapted from Deborde et al.  
28 2008.<sup>1</sup>

29

30

A

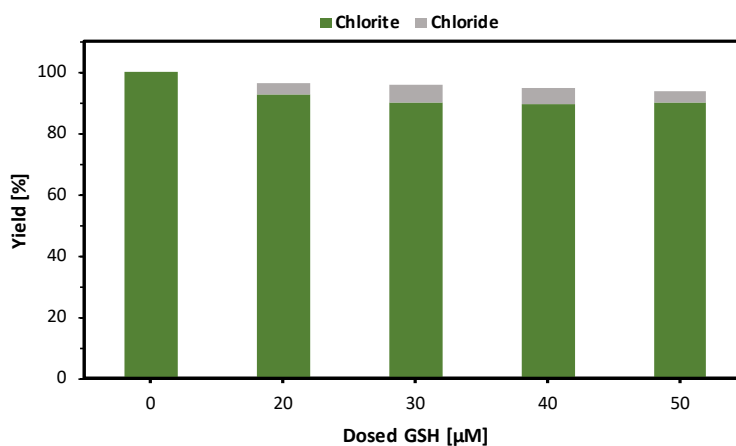

B

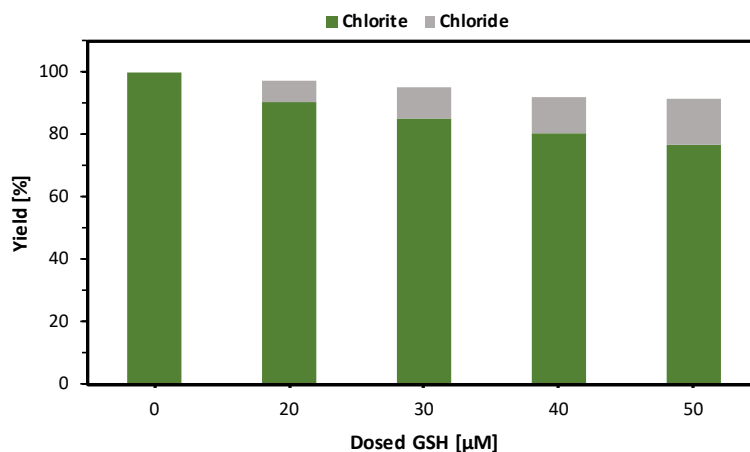

C

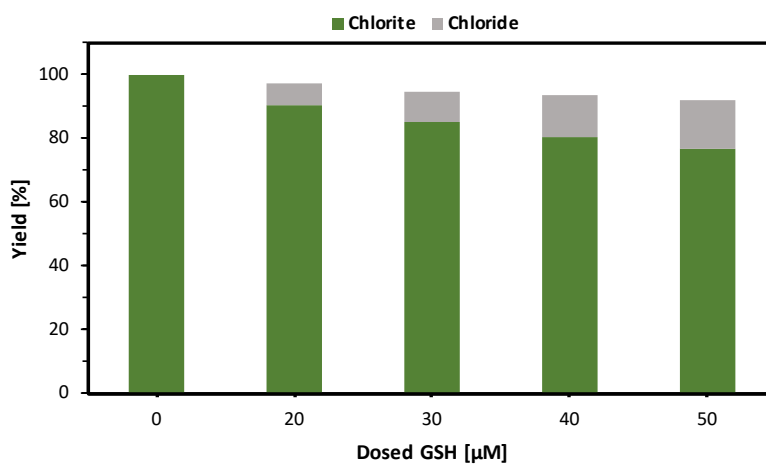

31 Figure S2: Turnover of  $\text{ClO}_2^-$  to  $\text{Cl}^-$  in GSH reaction. Different doses of GSH (0 – 50  $\mu\text{M}$ ) were dosed to  
32 100  $\mu\text{M}$   $\text{ClO}_2^-$  and chlorine species were measured by IC after different reaction times (A=5min, B = 24  
33 hours, C = 48 hours). The reaction solution contained additionally 10 mM glycine and 5 mM phosphate  
34 buffer at pH 7. Note that glycine was added to observe potential FAC formation.

35 **Text S1: Determination of Reaction stoichiometry**

36 For the reaction of GSH with ClO<sub>2</sub> the reaction stoichiometry has been determined as well. In order  
37 to determine the consumption of ClO<sub>2</sub> in presence of different concentrations of GSH were  
38 measured. Therefore, 200 μM ClO<sub>2</sub> was added to a 3 mL cuvette in presence of 5 mM phosphate  
39 buffer and the solution was measured at 359 nm. Different concentrations of GSH were added and  
40 the degradation of ClO<sub>2</sub> was determined by direct UV adsorption at 359 nm (Figure S2). The slope  
41 of the ClO<sub>2</sub> degradation over the added GSH concentrations equals to the consumed molecules of  
42 ClO<sub>2</sub> per molecule of GSH.

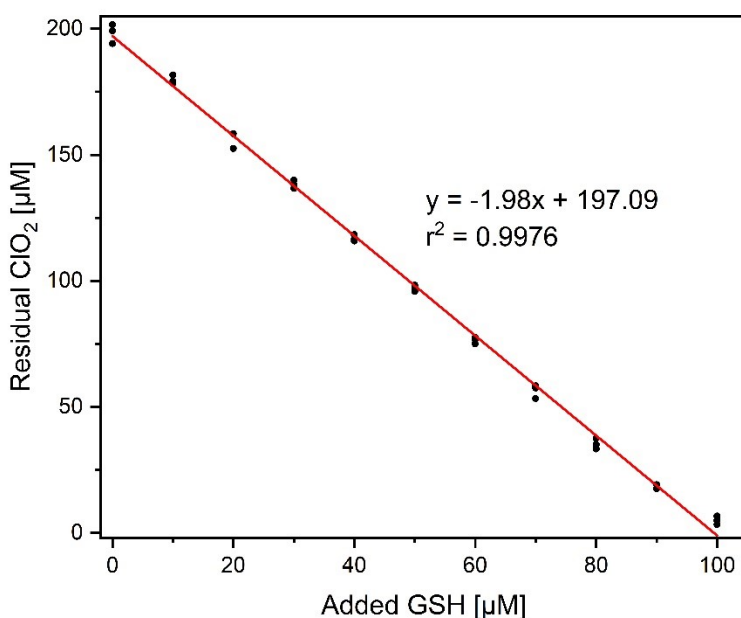

43

44 Figure S3: Degradation of ClO<sub>2</sub> by adding different concentration of GSH. Stock solution contained 200  
45 μM ClO<sub>2</sub> and 5 mM phosphate buffer at pH 7. Degradation of ClO<sub>2</sub> was measured by direct absorption at  
46 359 nm. All experiments were carried out in triplicates and the linear regression includes all data points.

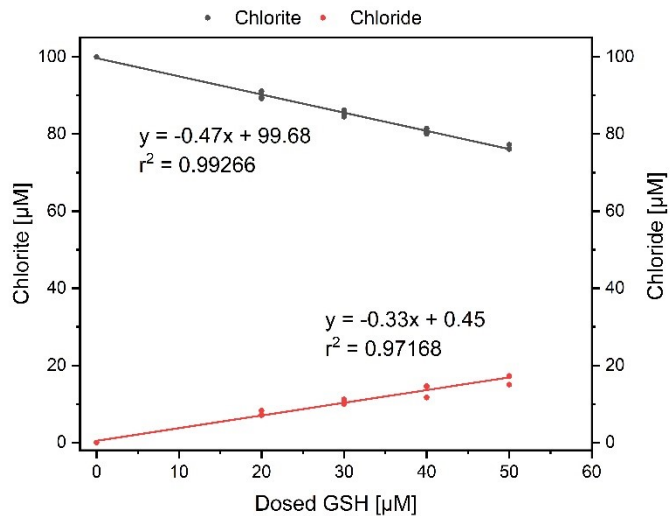

47

48 Figure S4: Degradation of  $\text{ClO}_2^-$  versus added GSH concentration after 24 hours of reaction time. Reaction  
 49 solution contained 100  $\mu\text{M}$   $\text{ClO}_2^-$ , 10 mM glycine, and 5 mM phosphate buffer at pH 7. Experiments were  
 50 carried out in triplicates and the linear regression includes all data points.

## 51 Literature

52 (1) Deborde, M.; von Gunten, U. *Water Res.* **2008**, *42* (1–2), 13–51.

53
